# Supplementary material for: N/P-doped NiFeV oxide nanosheets with oxygen vacancies as an efficient electrocatalyst for the oxygen evolution reaction
Source: Royal Society of Chemistry journal article supplement (doi:10.1039/d4dt00943f), 2024-01-01
Supplement: d4dt00943f1.pdf [file d4dt00943f1.pdf]

## Supplementary materials

### N/P-doped NiFeV oxide nanosheets with oxygen vacancy as Efficient Electrocatalysts for Oxygen Evolution Reactions

Jingyuan Zhang<sup>1</sup>, Zhen Ma<sup>1,2</sup>, Lanqi Wang<sup>1</sup>, Hui Ni<sup>1</sup>, Jianing, Yu<sup>1</sup>, Bin Zhao\*<sup>1</sup>

1. School of Materials and Chemistry, University of Shanghai for Science and Technology, Shanghai 200093, China

2. Business development, Edwards Limited, Shanghai, China

\*E-mail: zhaobin@usst.edu.cn

#### Experimental section

##### Material preparation

Nickel nitrate hexahydrate (99 %), ferrous sulfate heptahydrate (99 %), urea ( $\geq 99$  %), Ammonium fluoride ( $\geq 98$  %), KOH ( $\geq 90$  %), commercial IrO<sub>2</sub> (99 %) and Pt/C catalyst (20 wt%) were purchased from Shanghai Titan Technology Co., Ltd. Silver nitrate ( $\geq 99.8$  %) was purchased from Sinopharm Chemical Reagent Co., Ltd. Nafion solution (5 %) was purchased from Beijing Jingke Science Instrument Co., Ltd. Nick foam (thickness 1.7 mm) was purchased from Kunshan Longshengbao Electronic Materials Co., Ltd. All chemicals were used as received without further purification.

##### Synthesis of NiFeV-LDH/NF, NiFeVO /NF

Before used as based material, the NiO layer on the surface of NF need to be cleared. Thus, Ni foam (1.5 cm $\times$ 3 cm) was soaked in HCl solution (3 M) for 15 min and washed with deionized water and absolute ethanol for three times. The 0.5 mmol of Fe(NO<sub>3</sub>)<sub>3</sub>·9H<sub>2</sub>O, VCl<sub>3</sub> and 10 mmol of CO(NH<sub>2</sub>)<sub>2</sub> were dissolved in the solvents of 36 mL of deionized water by stirring for 0.5 hours in a N<sub>2</sub> atmosphere. Afterward, the solution was transferred to a 50 mL Teflon-lined stainless steel autoclave for 3 hours with the cleaned Ni foam. Then, the autoclave was maintained at 120 °C for 8 h. After the reaction, the product covered on Ni foam was washed with deionized water and absolute ethanol for three times and air dried at 60 °C for 4 h to obtain NiFeV-LDH electrocatalyst.

As control samples, undoped NiFe LDH and undoped VOOH are also synthesized at the same conditions. For the synthesis of N/P-VO and N/P -Ni-Fe<sub>2</sub>O<sub>3</sub>, the feeding ratio of V: Fe is changed to 1:0, 0:1 and other parameters remain consistent.

For the synthesis of NiFeVO, the as-obtained NiFeV-LDH precursor was placed in the reaction chamber of a plasma-enhanced chemical vapor deposition (PECVD) system, and N<sub>2</sub>/PH<sub>3</sub> plasma (N<sub>2</sub>/PH<sub>3</sub>: 20/50 sccm) treatment was performed at 100 W with a base pressure of 4 Pa. The N<sub>2</sub>/PH<sub>3</sub> plasma process was maintained for 30 min.

## Physicochemical characterization

X-ray diffraction (XRD) patterns were measured using a X'Pert PRO MPD diffractometer (Holland Panalytical) with Cu K $\alpha$  radiation. Raman spectroscopy with 532 nm excitation (Labram HR800 Evo) was adopted to confirm the structure and molecular structure. The sample morphology and composition were characterized by using a field-emission scanning electron microscope (FE-SEM, FEI, Quanta FEG 450) equipped with an energy dispersive X-ray spectrometer (EDS). Transmission electron microscopy (TEM) analysis was performed using a TECNAI F30 (FEI) microscope operated at 300 kV. For TEM observation, the catalyst nanosheets were dispersed in absolute ethanol by ultrasonic treatment for 30 min, and then dropped onto TEM grids. X-ray photoelectron spectroscopy (XPS) was performed by using ESCALAB250Xi (Thermo scientific) with a Mg K $\alpha$  X-ray source. All binding energies were calibrated via referencing to C 1s binding energy (284.6 eV).

## Electrochemical measurements

The electrochemical measurements were conducted in a three-electrode cell with a Gamry interface 1010E GAMRY electrochemical workstation, using the prepared self-supporting catalysts as working electrode, a mercury oxide electrode (Hg/HgO) as reference electrode, Pt mesh as counter electrode for OER. The electrolyte is 1 M KOH solution. All the potentials were corrected with iR-compensation. Electrochemical impedance spectroscopy (EIS) was conducted from 100 kHz to 0.1 Hz.

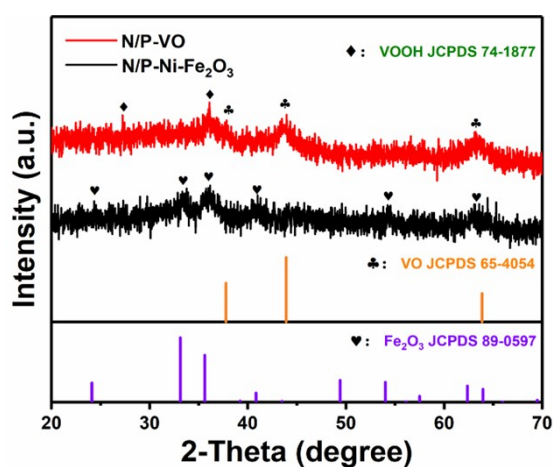

Fig. S1 XRD patterns of N/P-VO and N/P -Ni-Fe<sub>2</sub>O<sub>3</sub>.

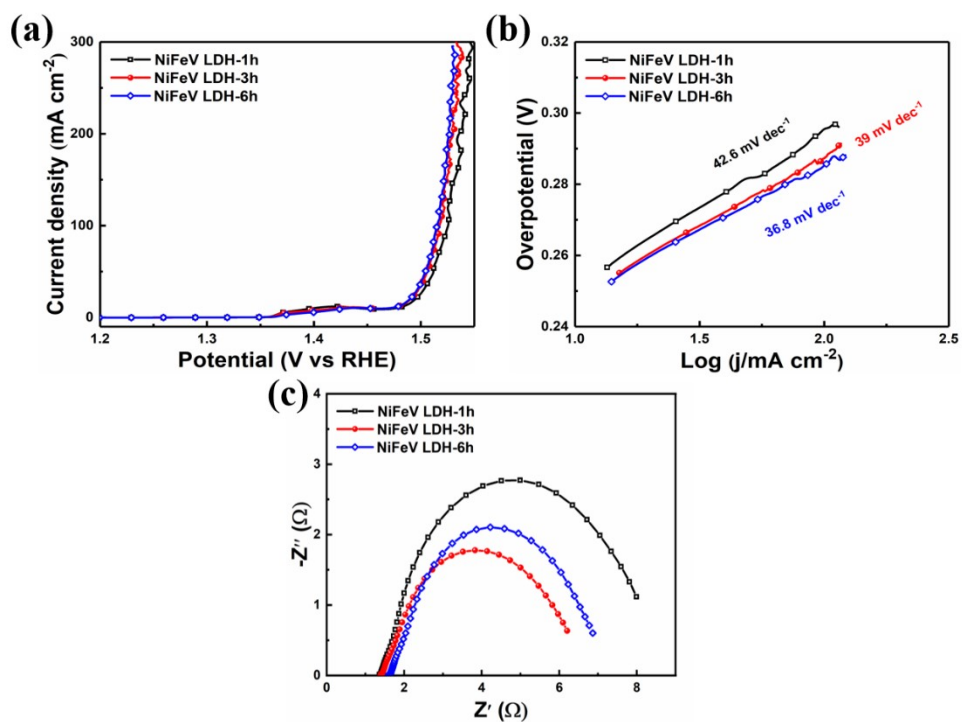

**Fig. S2** OER electrocatalytic performance of the NiFeV LDH for hydrothermal reaction time. (a) LSV curve (with  $iR$  correction) at  $2 \text{ mV s}^{-1}$ , (b) Tafel plot, (c) Nyquist plot.

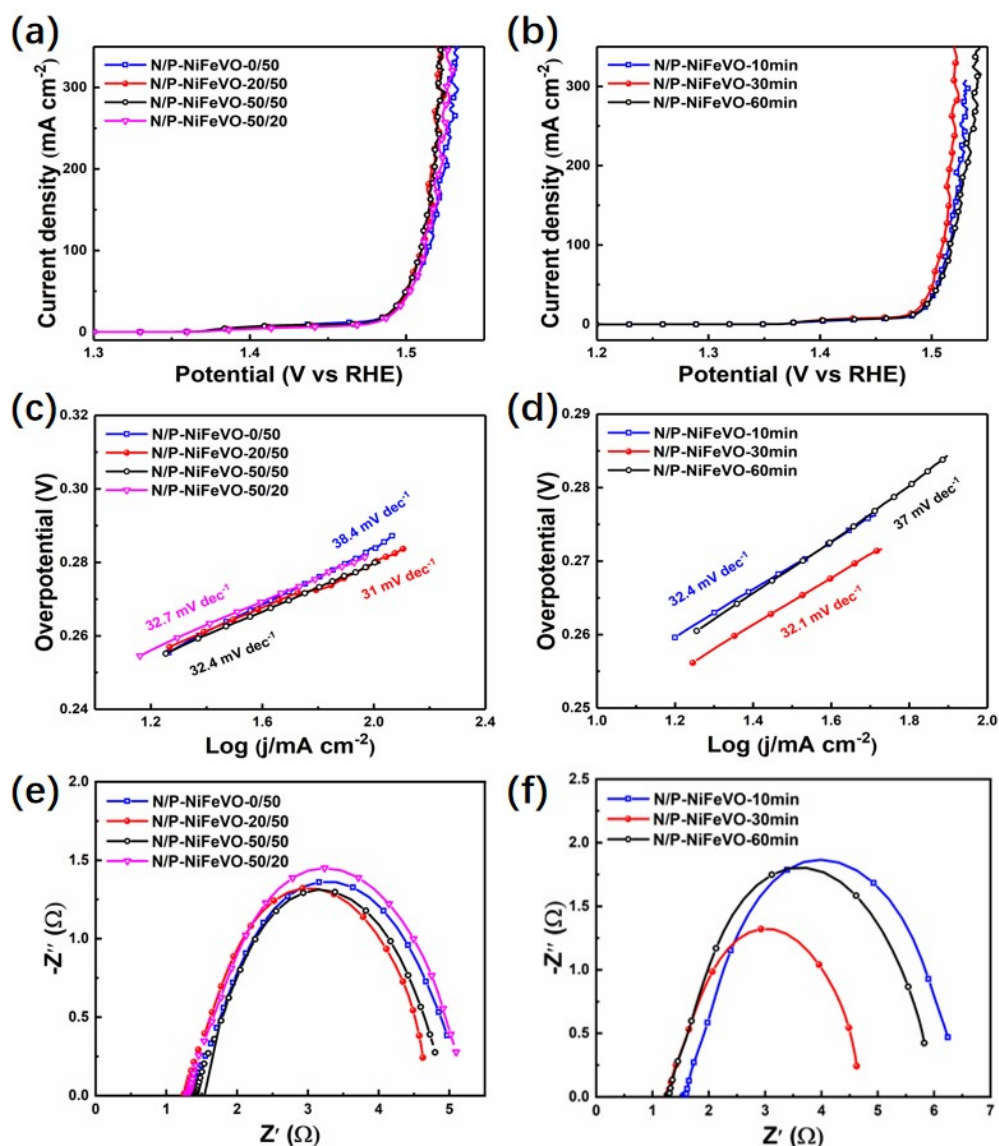

**Fig. S3** OER electrocatalytic performance of the N/P-NiFeVO for plasma (N<sub>2</sub>:PH<sub>3</sub> for 0:50, 20:50, 50:50, 50:20 sccm) treatment (a) LSV curve (with iR correction) at 2 mV s<sup>-1</sup>, (b) Tafel plot, (c) Nyquist plot. OER electrocatalytic performance of the N/P-NiFeVO for plasma treatment for 10 min, 30 min and 60 min. (d) LSV curve (with iR correction) at 2 mV s<sup>-1</sup>, (e) Tafel plot, (f) Nyquist plot.

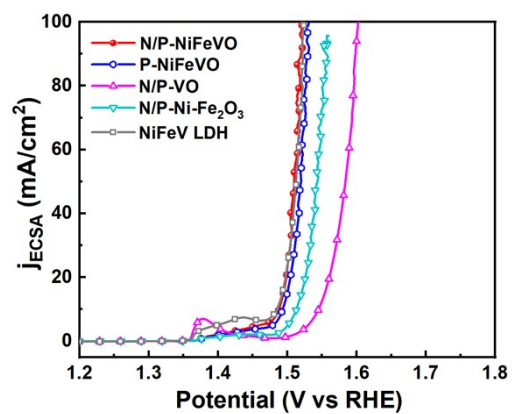

**Fig. S4**  $C_{\text{dl}}$ -normalized polarization curves.

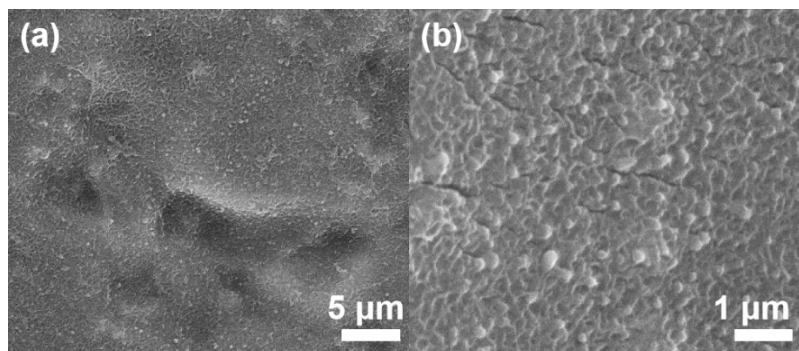

**Fig. S5** The SEM images of post-OER catalyst.

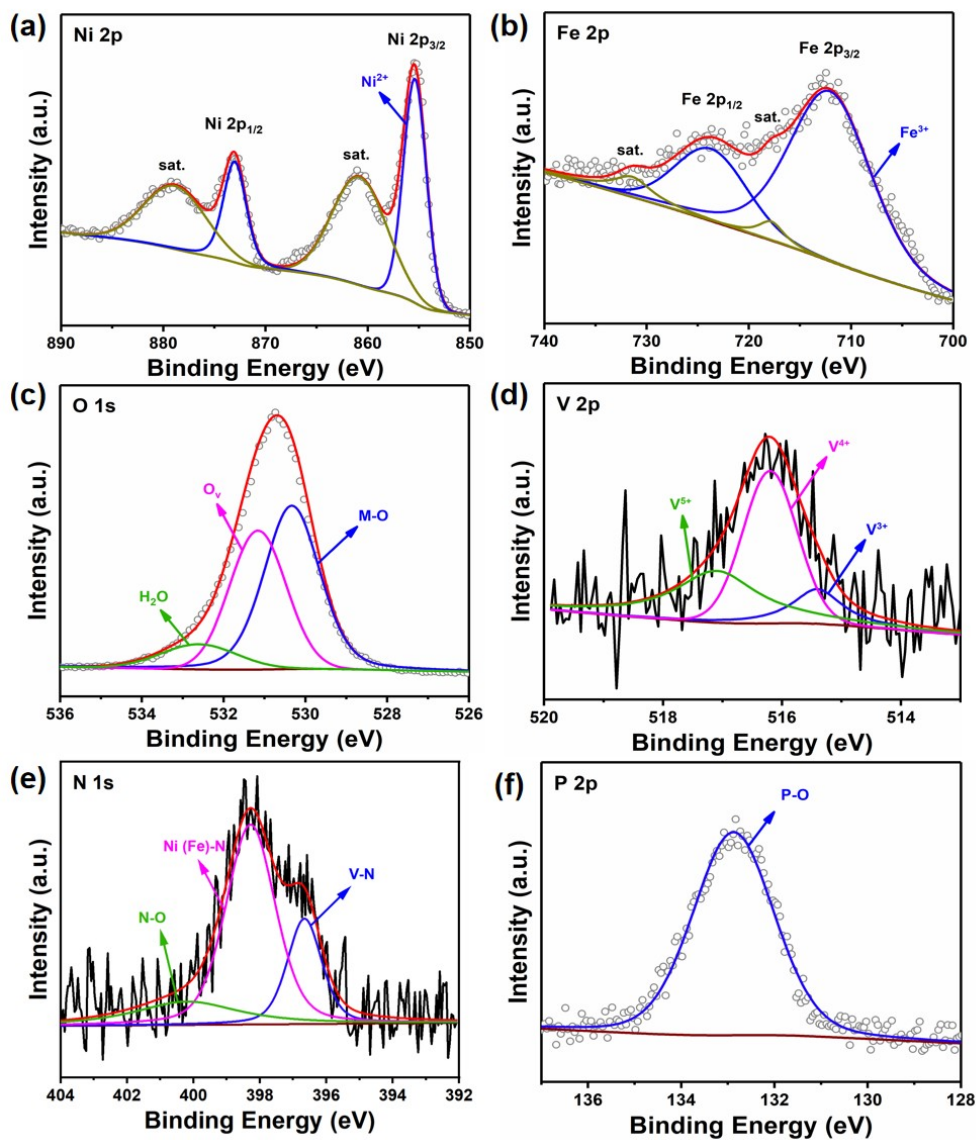

**Fig. S6** XPS spectra of the N/P-NiFeVO catalyst after OER stability test: (a) Ni 2p, (b) Fe 2p, (c) O 1s, (d) V 2p, (e) N 1s and (f) P 2p.

**Table S1** Comparison of OER performance of N/P-NiFeVO with other reported heterostructure electrocatalysts.

| Catalyst                                           | Electrolyte    | $\eta_{100}$ (mV) | Reference        |
|----------------------------------------------------|----------------|-------------------|------------------|
| Ag@Co(OH) <sub>x</sub>                             | 1 M KOH        | 440               | [1]              |
| Ni <sub>2</sub> P-NiFe <sub>2</sub> O <sub>4</sub> | 1 M KOH        | 305               | [2]              |
| FeNiZn/FeNi <sub>3</sub> @NiFe                     | 1 M KOH        | 258               | [3]              |
| Ag@NiCo-LDH/NF                                     | 1 M KOH        | 324               | [4]              |
| NiFe <sub>2</sub> O <sub>4</sub> /NiFe LDH         | 1 M KOH        | 275               | [5]              |
| H-CoS <sub>x</sub> @NiFe LDH/NF                    | 1 M KOH        | 312               | [6]              |
| NiFe LDH/NiS                                       | 1 M KOH        | 277               | [7]              |
| Ag/NCMO/NF                                         | 1 M KOH        | 299               | [8]              |
| N-NiVFeP/NFF                                       | 1 M KOH        | ~320              | [9]              |
| <b>N/P-NiFeVO</b>                                  | <b>1 M KOH</b> | <b>273</b>        | <b>This work</b> |

**Table S2** Comparison of recent electrocatalysts for overall water splitting.

| Catalyst                               | Electrolyte    | Cell voltage                           | Reference        |
|----------------------------------------|----------------|----------------------------------------|------------------|
| Ni <sub>2</sub> P-Fe <sub>2</sub> P/NF | 1 M KOH        | 1.561 V @ 10 mA cm <sup>-2</sup>       | [10]             |
| NiFe-LDH@NiCoP/NF                      | 1 M KOH        | 1.57 V @ 10 mA cm <sup>-2</sup>        | [11]             |
| NMS NFs                                | 1 M KOH        | 1.6 V @ 10 mA cm <sup>-2</sup>         | [12]             |
| $\delta$ -FeOOH NSs/NF                 | 1 M KOH        | 1.62 V @ 10 mA cm <sup>-2</sup>        | [13]             |
| Se-(NiCo)S/OH                          | 1 M KOH        | 1.6 V @ 10 mA cm <sup>-2</sup>         | [14]             |
| <b>N/P-NiFeVO</b>                      | <b>1 M KOH</b> | <b>1.56 V @ 100 mA cm<sup>-2</sup></b> | <b>This work</b> |

## References

- [1] Z. Zhang, X. Li, C. Zhong, N. Zhao, Y. Deng, X. Han, W. Hu, *Angew. Chem. Inter. Ed.* 2020, 59, 7245-7250.
- [2] Y. Li, Z. Zhang, Z. Zhang, J. He, M. Xie, C. Li, H. Lu, Z. Shi, S. Feng, *Appl. Catal. B Environ.* 2023, 339, 123141.
- [3] Q. Zhou, C. Xu, J. Hou, W. Ma, T. Jian, S. Yan, H. Liu, *Nano-Micro Letters* 2023, 15, 95.
- [4] B. Chu, Q. Ma, Z. Li, B. Li, F. Huang, Q. Pang, Y. Chen, B. Li, J. Z. Zhang, *Nanoscale* 2021, 13, 11150-11160.
- [5] X. Zhang, Y. Qiu, Q. Li, F. Liu, X. Ji, J. Liu, *Inter. Journal of Hydrogen Energy* 2022, 47, 40826-40834.
- [6] Y. J. Lee, S. K. Park, *Small* 2022, 18, 2200586.
- [7] Q. Wen, K. Yang, D. Huang, G. Cheng, X. Ai, Y. Liu, J. Fang, H. Li, L. Yu, T. Zhai, *Adv. Energy Mater.* 2021, 11, 2102353.
- [8] D. Li, Y. Qin, J. Liu, H. Zhao, Z. Sun, G. Chen, D. Y. Wu, Y. Su, S. Ding, C. Xiao, *Adv. Fun. Mater.* 2022, 32, 2107056.
- [9] H. F. Fan, W. Chen, G. L. Chen, J. Huang, C. S. Song, Y. Du, C. R. Li, K. K. Ostrikov, *Appl. Catal. B Environ.*, 2020, 268, 118440.
- [10] L. Wu, L. Yu, F. Zhang, B. McElhenny, D. Luo, A. Karim, S. Chen, Z. Ren, *Adv. Fun. Mater.* 2021, 31, 2006484.
- [11] H. Zhang, X. Li, A. Hähnel, V. Naumann, C. Lin, S. Azimi, S.L. Schweizer, A.W. Maijenburg, R.B. Wehrspohn, *Adv. Fun. Mater.* 2018, 28, 1706847.
- [12] Y. Qian, J. Yu, Y. Zhang, F. Zhang, Y. Kang, C. Su, H. Shi, D.J. Kang, H. Pang, *Small Methods* 2022, 6, 2101186.
- [13] Z. Xue, X. Li, Q. Liu, M. Cai, K. Liu, M. Liu, Z. Ke, X. Liu, G. Li, *Adv. Mater.* 2019, 31, 1900430.
- [14] C. Hu, L. Zhang, Z.-J. Zhao, A. Li, X. Chang, J. Gong, *Adv. Mater.* 2018, 30, 1705538.
